# Supplementary material
Source: publisher site journal article supplement (https://www.dovepress.com/article/590986)
Supplement: Supplementary file 1 [file 590986%20Revised%20supplementary%20files.docx]

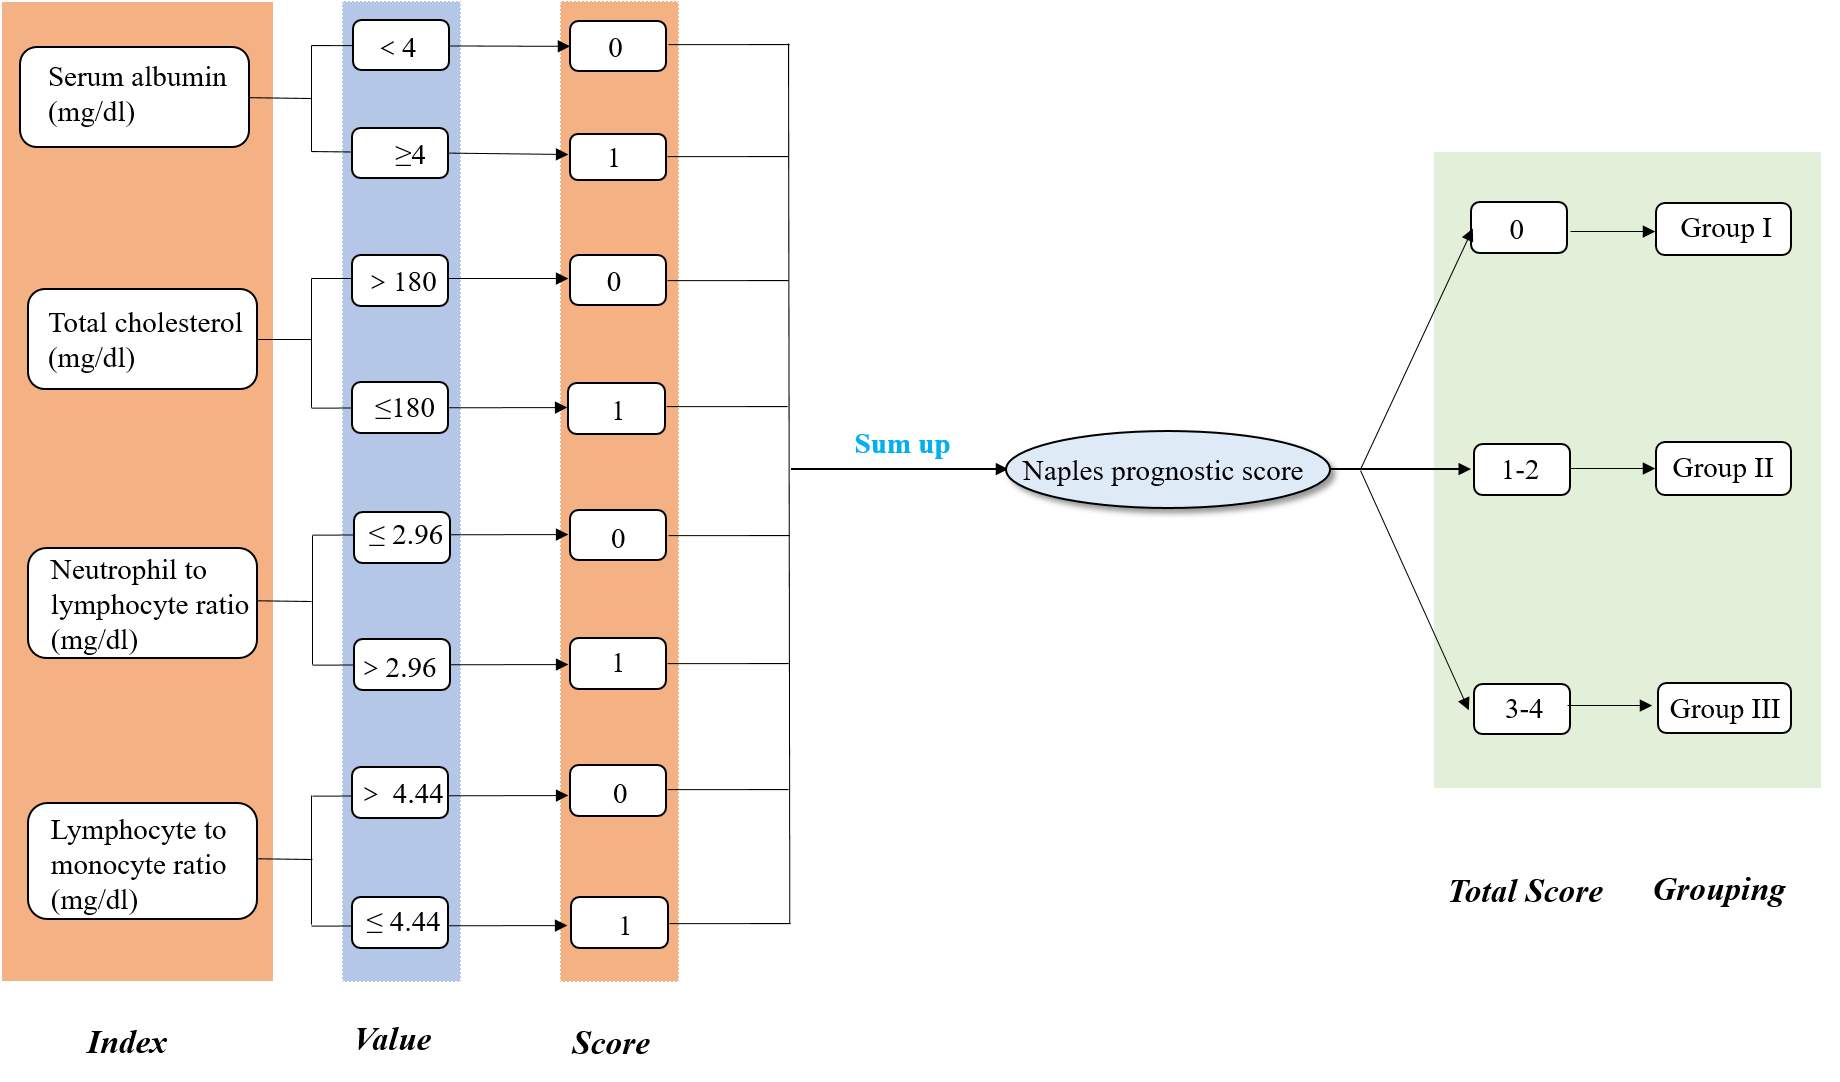


Figure S1 Calculation and grouping of the Naples prognostic score

| Table S1 Calculation formulas | |
| --- | --- |
| Clinical index | Calculation formula |
| NLR | Neutrophil count / lymphocyte count |
| LMR | Lymphocyte count / monocyte count |
| NPS | The following 4 conditions are awarded 1 point each if any are met, otherwise no points are awarded: serum albumin (mg/dL) ≥ 4, total cholesterol (mg/dL) > 180, NLR ≤ 2.96, and LMR > 4.44. The scores for the above 4 conditions are summed. The calculation range is 0-4 points. |
| BMI | Mass (kg) / height2(m2) |
| AbbreviationBMI, body mass index; LMR, lymphocyte-monocyte ratio; NLR, neutrophil-to-lymphocyte ratio; NPS, Naples prognostic score. | |

| Table S2 Age-adjusted Charlson comorbidity index (ACCI) | |
| --- | --- |
| ACCI Score | Clinical conditions |
| For comorbidities |  |
| 1 | Cerebrovascular disease; Chronic pulmonary disease; Connective tissue disease; Congestive heart failure; Dementia; Diabetes; Mild liver disease; Myocardial infarction; Peripheral vascular disease; Peptic ulcer disease |
| 2 | Any tumor; Diabetes with endo organ damage; Hemiplegia; Leukemia; Lymphoma; Moderate or severe renal disease |
| 3 | Moderate or severe liver disease |
| 6 | Acquired immune deficiency syndrome; Metastatic solid tumor |
| Age Adjustment |  |
| 1 (for each decade over 40 years, up to 4 points) | Add 1 point per decade over age 40 (e.g., 41–50 = 1 point, 51–60 = 2 points, etc.) |
| Notes: The total ACCI score = sum of comorbidity points and age points. | |

| Table S3. Shapiro-Wilk test. | |  |  |
| --- | --- | --- | --- |
| Variable | W statistic | P value | Distribution conclusion |
| Age | 0.960 | **0.001** | Non-normal |
| Hemoglobin | 0.992 | 0.135 | Normally distributed |
| Albumin | 0.996 | 0.457 | Normally distributed |
| NLR | 0.988 | 0.078 | Normally distributed |
| LMR | 0.995 | 0.315 | Normally distributed |
| TC | 0.987 | 0.074 | Normally distributed |
| BMI | 0.991 | 0.099 | Normally distributed |
| DFS | 0.975 | **0.002** | Non-normal |
| OS | 0.923 | **< 0.001** | Non-normal |
| AbbreviationBMI, body mass index; DFS, disease-free survival; NLR, neutrophil-to-lymphocyte ratio; OS, overall survival; LMR, lymphocyte-to-monocyte ratio.  Bold values indicate statistical significance at p<0.05. | | | |

| Table S4 Assessment of multicollinearity among prognostic variables in patients with OPSCC undergoing curative-intent surgery. | | |
| --- | --- | --- |
| Variables | Tolerance | VIF |
| Age | 0.687 | 1.456 |
| Tumor location | 0.847 | 1.180 |
| Gender | 0.791 | 1.264 |
| ECOG PS score | 0.754 | 1.327 |
| p16 | 0.820 | 1.220 |
| ENE | 0.440 | 2.275 |
| Perineural invasion | 0.673 | 1.486 |
| VI | 0.541 | 1.850 |
| Surgical margin | 0.533 | 1.876 |
| AJCC Stage | 0.272 | 3.672 |
| BMI | 0.658 | 1.520 |
| NPS | 0.800 | 1.250 |
| ACCI | 0.620 | 1.614 |
| Adjuvant radiotherapy | 0.733 | 1.365 |
| Abbreviations: ACCI, age-adjusted Charlson comorbidity index; AJCC, American Joint Committee on Cancer; CI, confidence interval; ECOG PS, eastern cooperative oncology group performance status; ENE, extranodal extension; HR, hazard ratio; IQR, interquartile range; NPS, Naples prognostic score; OPSCC, oropharyngeal squamous cell carcinoma; OS, overall survival; VI, vascular invasion.; VIF, variance inflation factor. | | |

| Table S5 Missing data and handling methods for variables in postoperative OPSCC patients | | | |
| --- | --- | --- | --- |
| Variables | Missing cases (n) | Missing proportion (%) | Handling method |
| Age | 0 | 0 | None |
| Gender | 0 | 0 | None |
| Tumor location | 17 | 4.6% | Complete case deletion |
| ECOG PS | 16 | 4.3% | Complete case deletion |
| p16 | 30 | 8.1% | Multiple imputation |
| ENE | 8 | 2.2% | Complete case deletion |
| Perineural invasion | 10 | 2.7% | Complete case deletion |
| VI | 13 | 3.5% | Complete case deletion |
| Safety margin | 0 | 0 | None |
| AJCC Stage | 67 | 18.1% | Multiple imputation |
| BMI | 5 | 1.4% | Complete case deletion |
| NPS | 23 | 6.2% | Multiple imputation |
| ACCI | 0 | 0 | None |
| Adjuvant radiotherapy | 0 | 0 | None |
| Abbreviations ACCI, age-adjusted Charlson comorbidity index; AJCC, American Joint Committee on Cancer; BMI, body mass index; ECOG PS, eastern cooperative oncology group performance status; ENE, extranodal extension; NPS, Naples prognostic score; OPSCC, oropharyngeal squamous cell carcinoma; VI, vascular invasion. | | | |

| Table S6 RECORD Checklist | | | |
| --- | --- | --- | --- |
| Item No. | STROBE Item | RECORD Item | Location in manuscript / Explanation | |
| Title and Abstract |  |  |  | |
| 1 | (a) Indicate the study’s design with a commonly used term in the title or the abstract. (b) Provide in the abstract an informative and balanced summary of what was done and what was found. | RECORD 1.1: The type of data used should be specified in the title or abstract. When possible, the name of the databases used should be included. RECORD 1.2: If applicable, the geographic region and time frame within which the study took place should be reported in the title or abstract. RECORD 1.3: If linkage between databases was conducted for the study, this should be clearly stated in the title or abstract. | RECORD 1.1: The data source for this study was the electronic medical record systems of three hospitals. Since the study data were directly extracted from the local medical record systems of each hospital and there was no unified, named administrative or registry database, there was no database name that could be clearly identified. The type of study (multicenter retrospective study) and the type of data are presented in the title and abstract.  RECORD 1.2:  The geographic region and time frame of the study are not listed separately in the title or abstract but are detailed in the Methods (Materials) section, including the three participating hospitals and the time frame of the study (August 2010 to September 2020).  RECORD 1.3： Not applicable. No database linkage was made. | |
| Introduction |  |  |  | |
| 2  *Background rationale* | Explain the scientific background and rationale for the investigation being reported. |  | The Background section has been comprehensively explained. | |
| 3  *Objectives* | State specific objectives, including any prespecified hypotheses. |  | The Background section concludes with a distinct articulation of the study's purpose. | |
| Methods |  |  |  | |
| 4  *Study Design* | Present key elements of study design early in the paper. |  | The first sentence of the Methods section mentions: "This is a multicenter retrospective investigation". | |
| 5  *Setting* | Describe the setting, locations, and relevant dates, including periods of recruitment, exposure, follow-up, and data collection. |  | The three hospitals and the time frame (August 2010 to September 2020) are listed in the "Materials" section of Methods. | |
| 6  *Participants* | (a) Cohort study: Give the eligibility criteria and the sources and methods of selection of participants. (b) Cohort study: For matched studies, give matching criteria. | RECORD 6.1: The methods of study population selection should be listed in detail. If this is not possible, an explanation should be provided. RECORD 6.2: Any validation studies of the codes or algorithms used to select the population should be referenced. If validation was conducted for this study and not published elsewhere, detailed methods and results should be provided. RECORD 6.3: If the study involved linkage of databases, consider use of a flow diagram or other graphical display to demonstrate the data linkage process. | RECORD 6.1:  The inclusion and exclusion criteria are detailed in the "Materials" section of Methods, along with a flow chart in Figure 1.  RECORD 6.2 and RECORD 6.2 are not applicable. No diagnostic codes or algorithms were used to screen the population. No data linkage was performed. | |
| 7  *Variables* | Clearly define all outcomes, exposures, predictors, potential confounders, and effect modifiers. Give diagnostic criteria, if applicable. | RECORD 7.1: A complete list of codes and algorithms used to classify exposures, outcomes, confounders, and effect modifiers should be provided. If these cannot be reported, an explanation should be provided. | The "Variables" section of Methods explicitly defines all variables. Variables were clinicopathological measures, and no diagnostic codes or algorithms were used. | |
| 8  *Datasources/*  *measurement* | For each variable of interest, give sources of data and details of methods of assessment (measurement). |  | The Methods "Variables" section states that data were derived from electronic medical records and follow-up records. | |
| 9  *Bias* | Describe any efforts to address potential sources of bias. |  | In order to minimize the potential selection bias and information bias in the retrospective study, the following measures were implemented (detailed in the Methods section): (1) Clear and uniform inclusion and exclusion criteria were established and uniformly applied across the three study centers; (2) All clinicopathological variables were retrieved from objective records in the electronic medical record system to mitigate recall bias. (3) A pre - defined treatment strategy was employed for missing data to reduce the bias resulting from missing data. Relevant limitations and potential biases are further discussed in the Limitations section of the Discussion. | |
| 10  *Study size* | Explain how the study size was arrived at. |  | The sample size was determined naturally based on the inclusion and exclusion criteria and was not calculated in advance. | |
| 11  *Quantitative variables* | Explain how quantitative variables were handled in the analyses. If applicable, describe which groupings were chosen and why. |  | The Analysis section of the Methods describes the treatment of continuous variables and the basis for grouping. | |
| 12  *Statistical methods* | (a) Describe all statistical methods. (b) Describe any methods used to examine subgroups and interactions. (c) Explain how missing data were addressed. (d) Cohort study: If applicable, explain how loss to follow-up was addressed. (e) Describe any sensitivity analyses. |  | All study methods are comprehensively detailed in the Methods section. The SPSS software (version 26.0) and R software (version 4.22) were employed for statistical analysis. Initially, all patients were randomly allocated into the training set and the validation set at an approximate ratio of 3:1. The tolerance and variance inflation factor (VIF) were computed using linear regression to examine the multicollinearity among independent variables (all VIF < 5, suggesting no severe collinearity).  (a) Statistical methods:  In the training set, a univariate Cox proportional hazards regression model was utilized to initially screen prognostic factors related to disease - free survival (DFS) and overall survival (OS). Subsequently, a multivariate Cox regression (backward stepwise method) was applied to further identify the independent prognostic factors, and the hazard ratio (HR) and 95% confidence interval (CI) were calculated. Based on the independent prognostic factors, nomogram models were constructed to predict DFS and OS respectively.  (b) Subgroup and interaction analysis:  After the establishment of a risk stratification system, the impact of adjuvant radiotherapy on DFS and OS in different risk subgroups (high, intermediate, and low risk) was further analyzed by the Kaplan - Meier method and the Log - rank test. No pre - specified interaction terms were designated for testing.  (c) Handling of missing data: For missing data, distinct strategies were adopted according to the missing rate: variables with a missing rate of less than 5% were analyzed through complete case analysis; variables with missing rates ranging from 5% to 20% were imputed using predictive mean matching for multiple imputation, resulting in 10 imputed data sets. Cox regression analysis was conducted separately for each data set, and finally, the estimated results (HR and 95%CI) were combined using Rubin's rules. Specific missing variables, their corresponding missing rates, and the handling methods are presented in Supplementary Table S5.  (d) Management of Loss to Follow - up: In this study, "lack of regular follow - up" (N = 46) was incorporated as one of the exclusion criteria during the enrollment stage. Consequently, the patients in the final analysis cohort had complete follow - up information, and no additional statistical adjustment was made for loss to follow - up.  (e) Sensitivity Analysis and Model Validation: No conventional sensitivity analyses (e.g., excluding specific cases or altering model specifications) were carried out. Nevertheless, the robustness and generalization ability of the model were comprehensively assessed using the following internal validation methods: 1. The dataset was randomly partitioned into a training set and a validation set. The concordance index (C - index), area under the receiver operating characteristic curve (AUC), calibration curve, and decision curve analysis (DCA) were employed to assess the discrimination, calibration, and clinical applicability of the model. The Integrated Discrimination Improvement index (IDI) and Net Reclassification Improvement index (NRI) were computed to contrast the predictive performance between the new model and the traditional AJCC staging system. 4. The aforementioned evaluation was replicated in the validation set to guarantee the stable performance of the model. | |
| *Data access and cleaning methods* |  | RECORD 12.1: Authors should describe the extent to which the investigators had access to the database population used to create the study population.  RECORD 12.2: Authors should provide information on the data cleaning methods used in the study. | RECORD 12.1: The Analysis section of Methods details the statistical methods, handling of missing data, and subgroup analyses. Investigators accessed the electronic medical record systems of the three hospitals to extract data on eligible patients.  RECORD 12.2: The strategy for handling missing data (<5% deletion and 5 to 20% imputation of predicted mean matching) is described in Analysis in Methods. | |
| Linkage |  | RECORD 12.3: State whether the study included person-level, institutional-level, or other data linkage across two or more databases. The methods of linkage and methods of linkage quality evaluation should be provided. | Not applicable. No linkage was established with the database. | |
| Results |  |  |  | |
| 13  *Participants* | (a) Report the numbers of individuals at each stage of the study. (b) Give reasons for nonparticipation at each stage. (c) Consider use of a flow diagram. | RECORD 13.1: Describe in detail the selection of the persons included in the study, including filtering based on data quality, data availability, and linkage. The selection of included persons can be described in the text and/or by means of the study flow diagram. | Figure 1 is a flow chart, which clearly shows the number of people in each stage of screening and the reasons for exclusion. | |
| 14  *Descriptive data* | (a) Give characteristics of study participants. (b) Indicate the number of participants with missing data for each variable of interest. (c) Cohort study: summarise follow-up time. |  | Table 1 presents the baseline characteristics.  The processing of missing data has been specified in the Method section, and a separate list is provided in Table S5.  All enrolled patients underwent follow - up. The median follow - up time was 130 months, and the patients were followed up until October 2025 or death. The follow - up duration was determined based on the assessment of survival outcome. | |
| 15  *Outcome data* | Cohort study: Report numbers of outcome events or summary measures over time. |  | Tables 2 & 3 present the outcomes of the survival analysis, while Figure 6 depicts the survival curve. | |
| 16  *Main results* | (a) Give unadjusted estimates and, if applicable, confounder-adjusted estimates and their precision. (b) Report category boundaries when continuous variables were categorized. (c) If relevant, consider translating estimates of relative risk into absolute risk. |  | Table 2 & 3 present the adjusted hazard ratio (HR), 95% confidence interval (CI), and P - values.  The group boundaries are described in the "Risk Stratification System" section within the Results section. Absolute risk transformations were not provided. | |
| 17  *Other analyses* | Report other analyses done – e.g., analyses of subgroups and interactions and sensitivity analyses. |  | Figure 7 and Table S6 show subgroup analyses (effect of adjuvant radiotherapy according to risk group).The "Limitations" section of the Discussion part addresses potential issues associated with the utilization of retrospective data. | |
| Discussion |  |  |  | |
| 18  *Key results* | Summarise key results with reference to study objectives. |  | The initial paragraph of the Discussion section presents a summary of the primary results. | |
| 19  *Limitations* | Discuss limitations of the study, taking into account sources of potential bias or imprecision. | RECORD 19.1: Discuss the implications of using data that were not created or collected to answer the specific research question(s). Include discussion of misclassification bias, unmeasured confounding, missing data, and changing eligibility over time. | The final paragraph of Discussion details the limitations of this study. | |
| 20  *Interpretation* | Give a cautious overall interpretation of results considering objectives, limitations, multiplicity of analyses, results from similar studies, and other relevant evidence. |  | Each section of the Discussion is interpreted in conjunction with relevant literature. | |
| 21 *Generalisability* | Discuss the generalisability (external validity) of the study results. |  | Caution should be exercised when mentioning promotion at the end of the Discussion section. | |
| Other Information |  |  |  | |
| 22  *Funding* | Give the source of funding and the role of the funders for the present study and, if applicable, for the original study on which the present article is based. |  | The Funding Information section elucidates the source of funding. | |
|  | Accessibility of protocol,  Raw data, and programming  code | RECORD 22.1: Authors should provide information on how to access any supplemental information such as the study protocol, raw data, or programming code. | In the Data Availability section, it is stated that data can be obtained upon request from the corresponding author, and no public link was provided. | |

| Table S7. Benefit of Adjuvant radiotherapy on prediction for DFS and OS in different subgroups. | | | |
| --- | --- | --- | --- |
| Subgroups  (Total risk points) | Adjuvant radiotherapy | Chi-Square | P |
| High-risk group for DFS  (≥ 120.5) | No (n =72) | 15.7 | **<0.001** |
| Yes (n =72) |  |  |
| Medium-risk group for DFS  (77.0-118.0) | No (n = 65) | 0.321 | 0.570 |
| Yes (n = 96) |  |  |
| Low-risk group for DFS  (≤ 78.9) | No (n = 28) | 2.26 | 0.134 |
| Yes (n = 39) |  |  |
| High-risk group for OS  (≥ 133.5) | No (n = 71) | 10.5 | **0.001** |
| Yes (n = 74) |  |  |
| Medium-risk group for OS  (80.4-132.0) | No (n = 61) | 0.024 | 0.880 |
| Yes (n = 91) |  |  |
| Low-risk group for OS  (≤ 79.9) | No (n = 33) | 0.801 | 0.371 |
| Yes (n = 42) |  |  |
| Abbreviation DFS, disease-free survival; OS: overall survival.  Bold values indicate statistical significance at p<0.05. | | | |

| Table S8 Comparison of complete-case analysis and multiple imputation for missing AJCC stage data. | | | | |
| --- | --- | --- | --- | --- |
| Analysis | Sample size | DFS C-index | OS C-index | Independent prognostic factors |
| Complete case | 305 | 0.678 | 0.661 | Same as main analysis |
| Imputed dataset | 372 | 0.661 | 0.665 | Same as main analysis |
| Abbreviations C-index, concordance index; DFS, disease-free survival; OS, overall survival | | | | |
